# Supplementary material for: Two heterotrimetallic organic frameworks constructed using a functionalized Schiff base ligand: syntheses, structures and visible photocatalytic activities for the degradation of chlorophenols
Source: Royal Society of Chemistry journal article supplement (doi:10.1039/c6ra18817f), 2016-01-01
Supplement: c6ra18817f1.pdf [file c6ra18817f1.pdf]

Electronic supplementary information

**Two heterotrimetallic organic frameworks constructed by a functionalized Schiff base ligand: syntheses, structures and visible photocatalytic activities for the degradation of chlorophenols**

**Li Ma,<sup>a</sup> Peng Du,<sup>b</sup> Jin Yang,<sup>a</sup> Ying-Ying Liu,<sup>\*a</sup> Xiao-Li, Liu,<sup>c</sup> and Jian-Fang Ma<sup>\*a</sup>**

<sup>a</sup> Key Laboratory of Polyoxometalate Science, Department of Chemistry, Northeast Normal University, Changchun 130024, P. R. China

<sup>b</sup> Department of Chemical Engineering, Yingkou Institute of Technology, Yingkou 115014, P. R. China

<sup>c</sup> Qingtongxia City Jiahua Chemical Co. Ltd. Qingtongxia 751603, P. R. China

**Experimental**

**Synthesis of H<sub>6</sub>L.** H<sub>6</sub>L was synthesized by 3-tertiarybutyl-5-((3,5-carboxybenzyl)oxy)salicylaldehyde (400 mg, 1 mmol) and ethylenediamine (30 mg, 0.5 mmol) in 100 mL of ethanol. The mixture was stirred for 4 h at room temperature, and then the yellow suspension was concentrated to 20 mL. The resulting yellow solid was filtered and washed with distilled water and dried in vacuum in 90% yield.

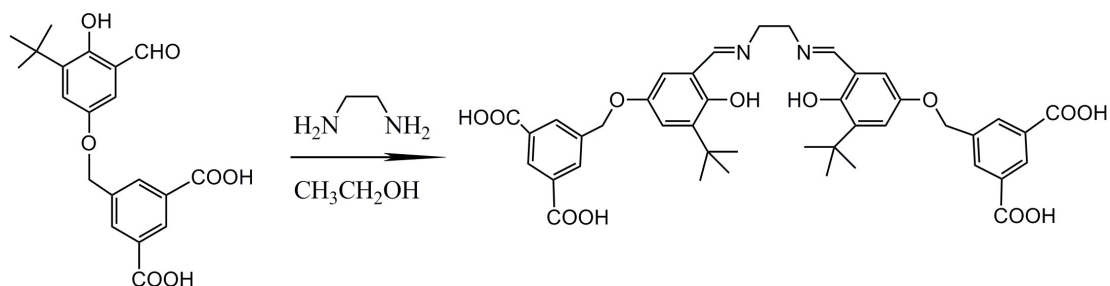

**Scheme S1.** Synthetic route of H<sub>6</sub>L

**Materials and instrumentation.** All reagents and organic solvents were of analytical grade and used without further purification. FT-IR spectra were measured from KBr pellets in the range 4000-400  $\text{cm}^{-1}$  on a Mattson Alpha-Centauri spectrometer. Elemental analyses (C, H and N) were performed on a Perkin-Elmer 240C elemental analyzer. Thermogravimetric measurements (TGA) were performed on a Perkin-Elmer TG-7 analyzer heated from 20 to 600  $^{\circ}\text{C}$  at a ramp rate of 10  $^{\circ}\text{C}/\text{min}$  (Figure S1). The powder X-ray diffraction (PXRD) patterns were measured on a Rigaku Dmax 2000 X-ray diffractometer with graphite monochromatized Cu-K $\alpha$  radiation ( $\lambda = 0.154 \text{ nm}$ ). In the process of photocatalytic degradation, the concentrations of CPs were measured through a gas chromatograph which allocated with a capillary column (30 m long  $\times$  0.25 mm i.d., Wonda CAP 17) and an FID detector (GC 2014, Shimadzu, Japan). The variable-temperature magnetic susceptibility data were collected using a SQUID magnetometer (Quantum Design, MPMS-5) with an applied field of 1000 Oe. Inductively coupled plasma (ICP) analyses were conducted on a Leeman Laboratories Prodigy inductively coupled plasma–optical atomic emission spectrometry (ICP-AES) system. Scanning electron microscopy (SEM) imaging was performed on Hitachi SU8010. Energy dispersive X-ray Spectroscopy (EDS) analysis was conducted on EDAX.

**Thermal analysis:** The weight loss of **1**, corresponding to the DMF and water, is observed over the temperature range from 20 to 250  $^{\circ}\text{C}$  (Found: 16.02%, calcd: 15.99%). Thermogravimetric and elemental analyses demonstrate the presence of *ca.* one DMF and two water molecules in **1**. The weight loss of **2**, corresponding to the DMF and water, is observed over the temperature range from 20 to 250  $^{\circ}\text{C}$  (Found: 16.80%, calcd: 16.46%). Thermogravimetric and elemental analyses demonstrate the presence of *ca.* one DMF and two water molecules in **2**.

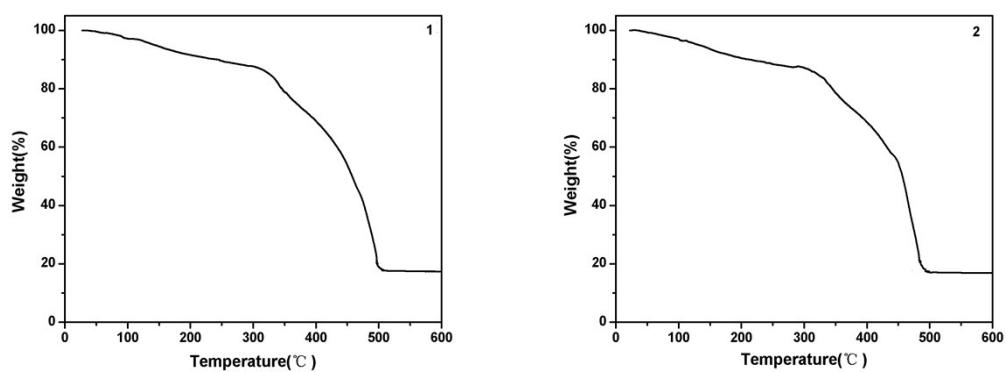

**Fig. S1** Thermogravimetric curves of 1 and 2.

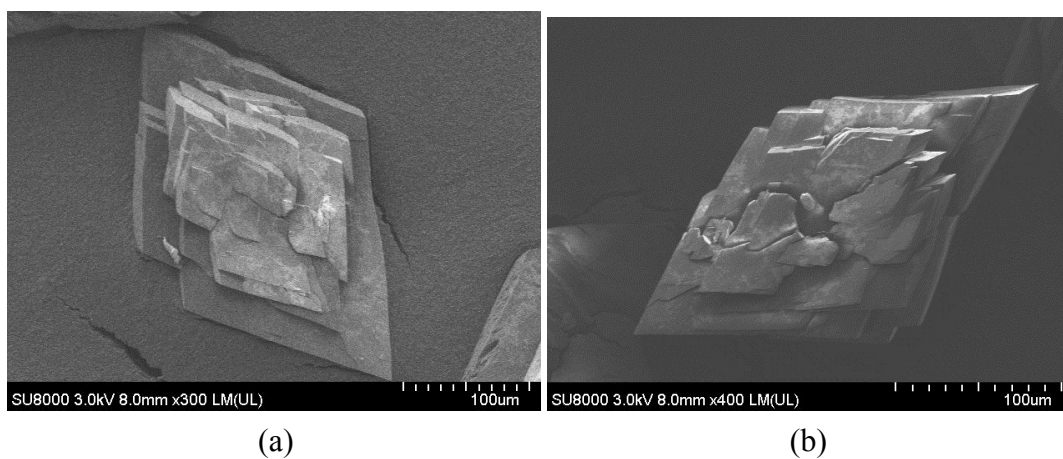

**Fig. S2** The SEM images of frameworks 1(a) and 2(b).

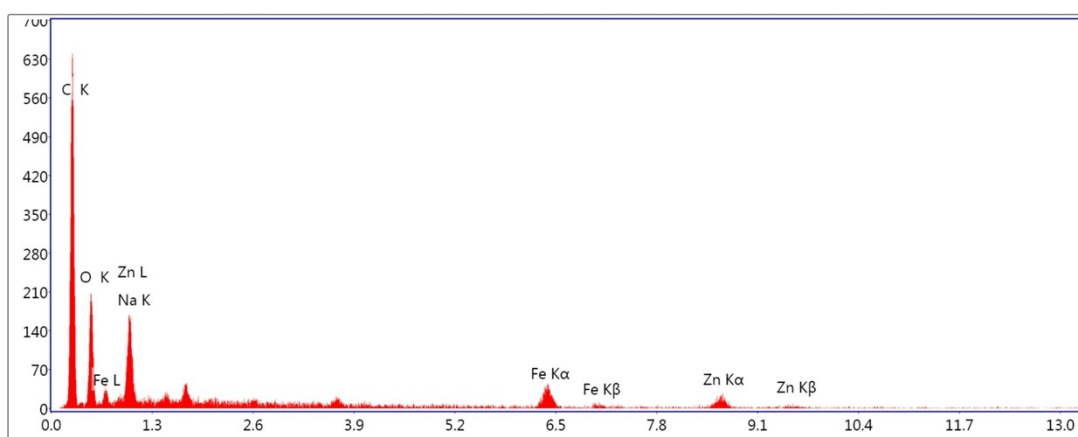

(a)

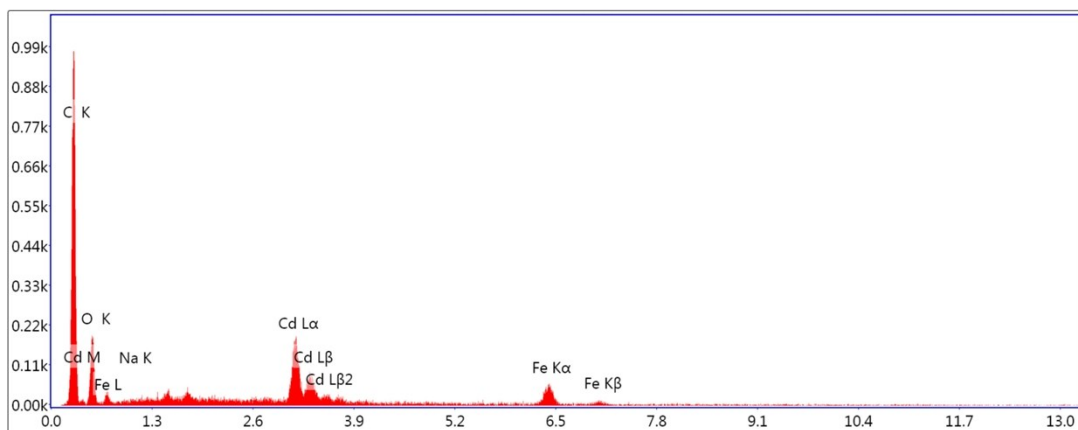

(b)

**Fig. S3** The EDS analysis of the frameworks **1(a)** and **2(b)**.

**Table S1** The ICP analyses of the frameworks **1** and **2**.

| <b>1</b> |              | <b>2</b> |              |
|----------|--------------|----------|--------------|
| Element  | Conc.(ug/mL) | Element  | Conc.(ug/mL) |
| Fe       | 55.962       | Fe       | 39.115       |
| Cd       | 114.794      | Zn       | 45.323       |
| Na       | 11.932       | Na       | 16.522       |

**Coordination modes of  $L^{6-}$  anions in **1** and **2**.** From the structural description, we can see that both the internal  $[N_2O_2]$  pockets of  $L^{6-}$  anions in **1** and **2** are embedded by Fe(III) ions, while the external tetracarboxylate groups adopt different coordination modes (Fig. S2). For **1**, the external carboxylates of  $L^{6-}$  anion are ligated by one Fe(III), one Na(I) and three Cd(II) atoms, while they attach to one Fe(III), three Na(I) and three Zn(II) atoms in framework **2**.

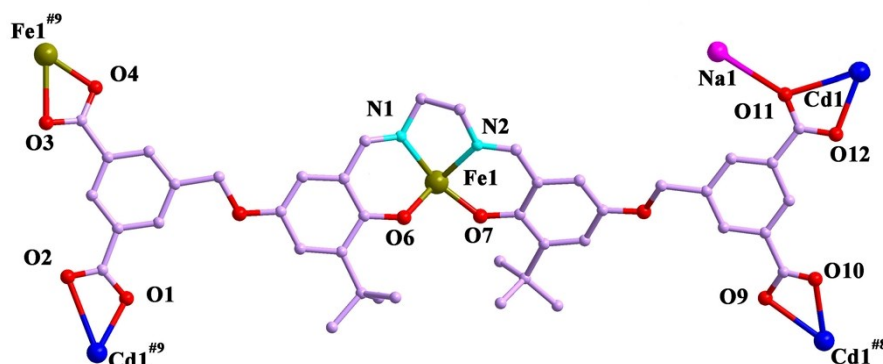

(a)

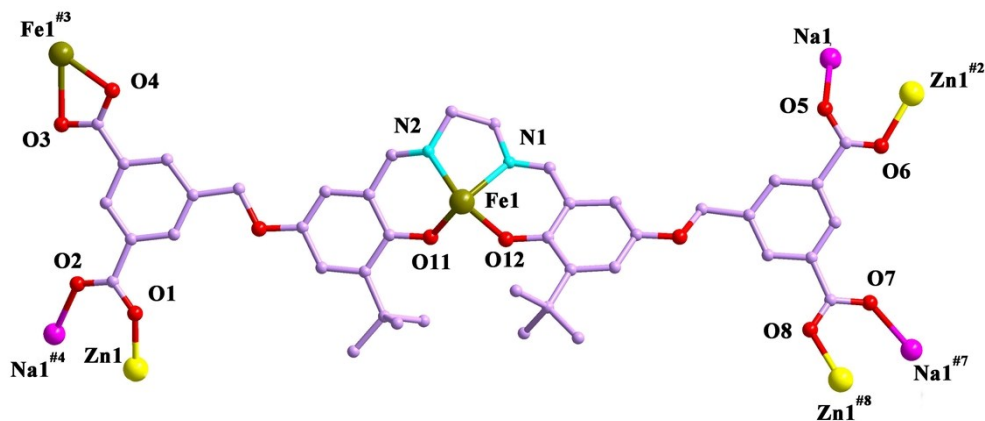

(b)

**Fig. S4** Coordination modes of  $L^{6-}$  anions in **1** (a) and **2** (b).

**X-ray crystallography.** Single-crystal X-ray data of compounds **1** and **2** were collected on an Oxford Diffraction Model Gemini R Ultra diffractometer with graphite-monochromated Mo  $K\alpha$  radiation ( $\lambda = 0.71073 \text{ \AA}$ ) at 293 K. Direct methods were used to solve the structures on SHELXL-97 and all of the structures were refined by full-matrix least-squares techniques using the SHELXL-97 program within WINGX.<sup>1-3</sup> Absorption corrections were applied by using a multiscan technique. The disordered atoms in **1** (O2w) and **2** (O2w, O3w) were split into two sites with a total occupancy of 1. All non-hydrogen atoms were refined with anisotropic temperature parameters. The crystal samples of **1** and **2** show the relatively weak diffraction because of highly disordered solvents in the frameworks. During the refinement, SQUEEZE function in PLATON were applied.<sup>4</sup> The lattice molecules in **1** (one  $(\text{CH}_3)_2\text{NH}_2^+$  cation, four free water and four free DMF molecules) and **2** (two free water and two free DMF molecules) were demonstrated by the difference Fourier maps of original X-ray data, TGA data and elemental analyses. Selected distances and angles are listed in Tables S2 and S3.

**Photocatalytic measurement.** The photocatalytic degradation experiment was performed through a conventional process in aqueous solution. Crystals **1** or **2** (100 mg) and 30%  $\text{H}_2\text{O}_2$  (2 mL,  $15 \text{ mg}\cdot\text{L}^{-1}$ ) were added into CP solutions (100 mL,  $66 \text{ mg}\cdot\text{L}^{-1}$ ), and their pH values were adjusted to different values with HCl (1 M). To

guarantee adsorption-desorption equilibrium between the photocatalyst and CP, the samples in tubular quartz reactor (100 mL) was stirred in the dark for 20 min. Then, the mixture was stirred under the irradiation of Hg lamp, which was used as the visible light source with a cutoff filter. At 20 min intervals, a series of 7 mL samples were taken out from the reaction system and separated by centrifugation to obtain the supernatant liquid. The photocatalytic decomposition separated samples were monitored by GC, and 2-pentanone was used as internal standard.

## Notes and references

1. G. M. Sheldrick, *SHELXS-97 Programs for X-ray Crystal Structure Solution*, University of Goettingen, Germany, 1997.
2. G. M. Sheldrick, *SHELXL-97 Programs for X-ray Crystal Structure Refinement*; University of Goettingen, Germany, 1997.
3. L. J. Farrugia, *WINGX A Windows Program for Crystal Structure Analysis*, University of Glasgow, Glasgow, UK, 1988.
4. A. L. Spek, *J. Appl. Crystallogr.*, 2003, **36**, 7–13.

**Table S2** Selected bond distances (Å) and angles (°) for **1**.

|                               |          |                               |           |
|-------------------------------|----------|-------------------------------|-----------|
| Fe(1)-O(7)                    | 1.874(4) | Cd(1)-O(1) <sup>#2</sup>      | 2.159(6)  |
| Fe(1)-O(6)                    | 1.891(4) | Cd(1)-O(12)                   | 2.241(9)  |
| Fe(1)-O(4) <sup>#1</sup>      | 2.029(4) | Cd(1)-O(10) <sup>#3</sup>     | 2.269(8)  |
| Fe(1)-N(1)                    | 2.097(5) | Cd(1)-O(9) <sup>#4</sup>      | 2.438(7)  |
| Fe(1)-N(2)                    | 2.118(5) | Cd(1)-O(13)                   | 2.52(2)   |
| Fe(1)-O(3) <sup>#1</sup>      | 2.305(5) | Cd(1)-O(13')                  | 2.36(2)   |
| Na(1)-O(11)                   | 2.975(1) | Cd(1)-O(11) <sup>#3</sup>     | 2.645(7)  |
| Na(1)-O(1W)                   | 1.893(8) | Na(1)-O(2W')                  | 2.73(2)   |
| Na(1)-O(2W)                   | 2.138(7) | O(7)-Fe(1)-O(6)               | 98.9(2)   |
| N(1)-Fe(1)-N(2)               | 76.0(2)  | O(7)-Fe(1)-O(4) <sup>#1</sup> | 103.8(2)  |
| O(7)-Fe(1)-O(3) <sup>#1</sup> | 95.2(2)  | O(6)-Fe(1)-O(4) <sup>#1</sup> | 90.7(2)   |
| O(6)-Fe(1)-O(3) <sup>#1</sup> | 149.4(2) | O(7)-Fe(1)-N(1)               | 161.5 (2) |

|                                               |          |                                                |          |
|-----------------------------------------------|----------|------------------------------------------------|----------|
| O(4) <sup>#1</sup> -Fe(1)-O(3) <sup>#1</sup>  | 59.6(2)  | O(6)-Fe(1)-N(1)                                | 86.3(2)  |
| N(1)-Fe(1)-O(3) <sup>#1</sup>                 | 88.7(2)  | O(4) <sup>#1</sup> -Fe(1)-N(1)                 | 93.8(2)  |
| N(2)-Fe(1)-O(3) <sup>#1</sup>                 | 88.9(2)  | O(7)-Fe(1)-N(2)                                | 86.0(2)  |
| O(1) <sup>#2</sup> -Cd(1)-O(12)               | 158.6(3) | O(6)-Fe(1)-N(2)                                | 118.7(2) |
| O(1) <sup>#2</sup> -Cd(1)-O(10) <sup>#3</sup> | 111.9(3) | O(4) <sup>#1</sup> -Fe(1)-N(2)                 | 147.4(2) |
| O(12)-Cd(1)-O(10) <sup>#3</sup>               | 89.2(4)  | O(10) <sup>#3</sup> -Cd(1)-O(11) <sup>#3</sup> | 84.8(3)  |
| O(1) <sup>#2</sup> -Cd(1)-O(9) <sup>#4</sup>  | 89.6(3)  | O(13')-Cd(1)-O(11) <sup>#3</sup>               | 103.0(1) |
| O(12)-Cd(1)-O(9) <sup>#4</sup>                | 102.0(4) | O(9) <sup>#4</sup> -Cd(1)-O(11) <sup>#3</sup>  | 130.6(3) |
| O(10) <sup>#3</sup> -Cd(1)-O(9) <sup>#4</sup> | 49.9(3)  | O(13)-Cd(1)-O(11) <sup>#3</sup>                | 123.7(8) |
| O(1) <sup>#2</sup> -Cd(1)-O(13)               | 84.2(6)  | O(12)-Cd(1)-O(11) <sup>#3</sup>                | 52.1(3)  |
| O(12)-Cd(1)-O(13)                             | 79.9(6)  | O(9) <sup>#4</sup> -Cd(1)-O(13)                | 81.3(1)  |
| O(10) <sup>#3</sup> -Cd(1)-O(13)              | 126.5(1) | O(1) <sup>#2</sup> -Cd(1)-O(11) <sup>#3</sup>  | 130.6(3) |
| O(1W)-Na(1)-O(2W)                             | 77.0(4)  | O(1W) <sup>#3</sup> -Na(1)-O(2W)               | 103.0(4) |

Symmetry transformations used to generate equivalent atoms:

<sup>#1</sup> -x, y-1/2, -z-1/2 ; <sup>#2</sup> x+1, y, z+1 ; <sup>#3</sup> -x+1, -y+1, -z+1 ; <sup>#4</sup> -x+1, y+1/2, -z+3/2.

**Table S3** Selected bond distances (Å) and angles (°) for **2**.

|                                |           |                                |             |
|--------------------------------|-----------|--------------------------------|-------------|
| Na(1)-O(2W')                   | 2.443(19) | Fe(1)-N(1)                     | 2.114(5)    |
| Na(1)-O(2W)                    | 1.996(12) | Fe(1)-N(2)                     | 2.091(6)    |
| Na(1)-O(5)                     | 1.972(11) | Fe(1)-O(3) <sup>#3</sup>       | 2.269(5)    |
| Na(1)-O(2) <sup>#1</sup>       | 2.041(8)  | Zn(1)-O(1)                     | 1.900(6)    |
| Na(1)-O(7) <sup>#2</sup>       | 2.061(10) | Zn(1)-O(6) <sup>#4</sup>       | 1.931(8)    |
| Fe(1)-O(12)                    | 1.868(5)  | Zn(1)-O(8) <sup>#5</sup>       | 2.013(8)    |
| Fe(1)-O(11)                    | 1.900(4)  | Zn(1)-O(1W)                    | 2.063(10)   |
| Fe(1)-O(4) <sup>#3</sup>       | 2.065(5)  | O(12)-Fe(1)-O(11)              | 98.83(18)   |
| O(2W)-Na(1)-O(5)               | 78.2(4)   | O(12)-Fe(1)-O(4) <sup>#3</sup> | 104.3 (2)   |
| O(2W)-Na(1)-O(2) <sup>#1</sup> | 75.3(4)   | O(11)-Fe(1)-O(4) <sup>#3</sup> | 90.74(18)   |
| O(5)-Na(1)-O(2) <sup>#1</sup>  | 110.2(4)  | O(12)-Fe(1)-N(2)               | 161.43 (19) |
| O(2W)-Na(1)-O(7) <sup>#2</sup> | 167.2(5)  | O(11)-Fe(1)-N(2)               | 86.16(19)   |

|                                              |           |                                              |            |
|----------------------------------------------|-----------|----------------------------------------------|------------|
| O(5)-Na(1)-O(7) <sup>#2</sup>                | 99.3(4)   | O(4) <sup>#3</sup> -Fe(1)-N(2)               | 93.4(2)    |
| O(2) <sup>#1</sup> -Na(1)-O(7) <sup>#2</sup> | 117.1(4)  | O(12)-Fe(1)-N(1)                             | 86.0(2)    |
| O(1)-Zn(1)-O(6) <sup>#4</sup>                | 142.5(4)  | O(11)-Fe(1)-N(1)                             | 118.5(2)   |
| O(1)-Zn(1)-O(8) <sup>#5</sup>                | 106.0(4)  | O(4) <sup>#3</sup> -Fe(1)-N(1)               | 147.5 (2)  |
| O(6) <sup>#4</sup> -Zn(1)-O(8) <sup>#5</sup> | 103.9(4)  | N(2)-Fe(1)-N(1)                              | 76.0(2)    |
| O(1)-Zn(1)-O(1W)                             | 99.5(4)   | O(12)-Fe(1)-O(3) <sup>#3</sup>               | 96.0(2)    |
| O(6) <sup>#4</sup> -Zn(1)-O(1W)              | 97.8(4)   | O(11)-Fe(1)-O(3) <sup>#3</sup>               | 150.14(17) |
| O(8) <sup>#5</sup> -Zn(1)-O(1W)              | 111.2(4)  | O(4) <sup>#3</sup> -Fe(1)-O(3) <sup>#3</sup> | 60.40(18)  |
| N(1)-Fe(1)-O(3) <sup>#3</sup>                | 88.14(15) | N(2)-Fe(1)-O(3) <sup>#3</sup>                | 88.0(16)   |

Symmetry transformations used to generate equivalent atoms:

<sup>#1</sup> -x+2, y-1/2, -z+5/2 ; <sup>#2</sup> x+1, y, z+1 ; <sup>#3</sup> -x+1, y+1/2, -z+1/2 ; <sup>#4</sup> x-1, y, z-1; <sup>#5</sup> -x+1, y-1/2, -z+3/2.

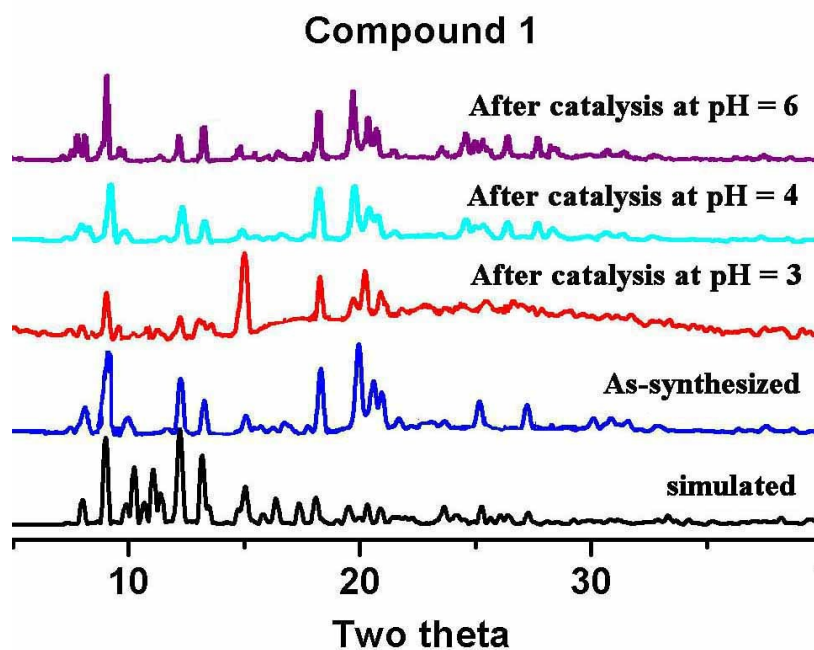



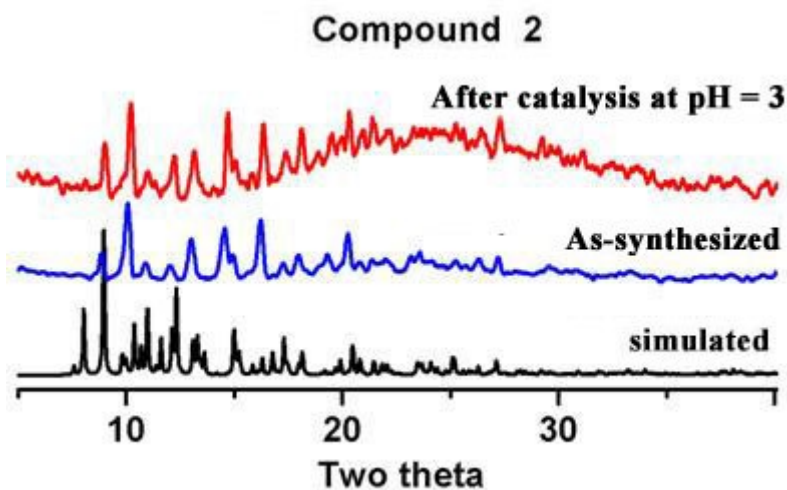

**Figure S5.** PXRD patterns for **1** and **2** after photodegradation of 4-CP.

**Table S4**

PEAK LIST

RT: 0.00-14.50

Number of measured peaks: 2 (the first peak is 2-pentanone, and the second peak is 4-CP)

|      | 0 min    | 20 min | 40 min | 60 min | 80 min |
|------|----------|--------|--------|--------|--------|
| Apex | 2.346    | 2.377  | 2.350  | 2.355  | 2.352  |
|      | 13.416   | 13.412 | 13.415 | 13.413 | 13.421 |
| Area | 125625   | 153316 | 96131  | 124360 | 132630 |
|      | 109527   | 130896 | 77300  | 99594  | 101682 |
| Mass | 0.0391 g |        |        |        |        |
|      | 0.00782g |        |        |        |        |

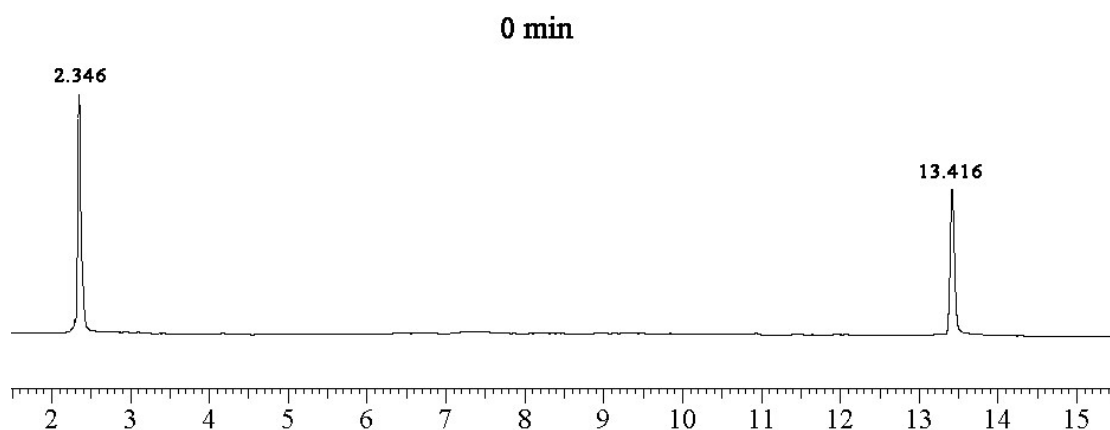

20 min

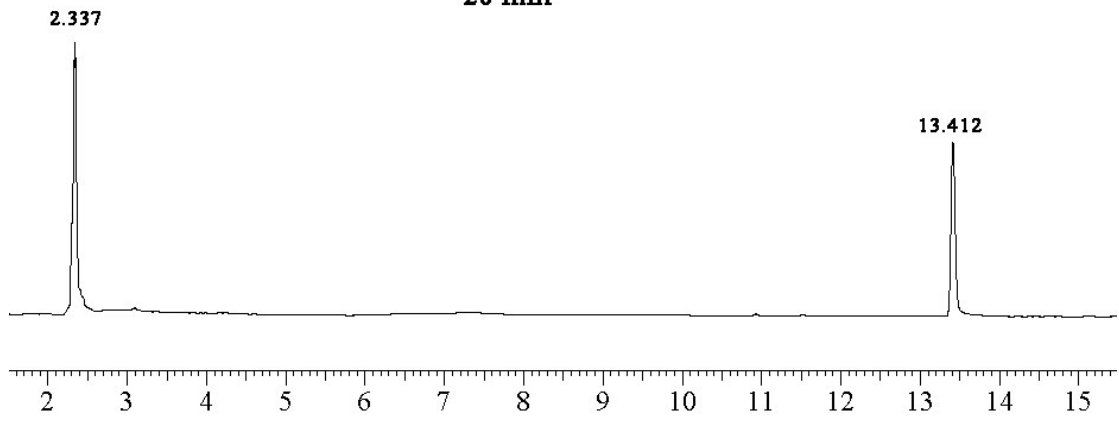

40 min

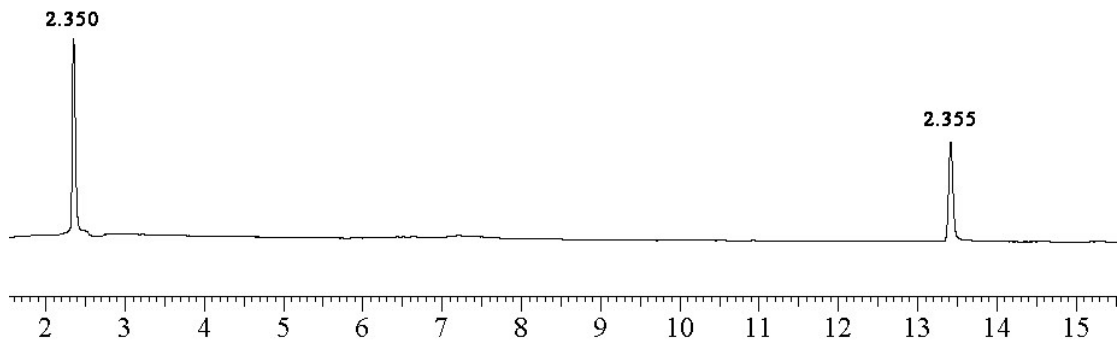

60 min

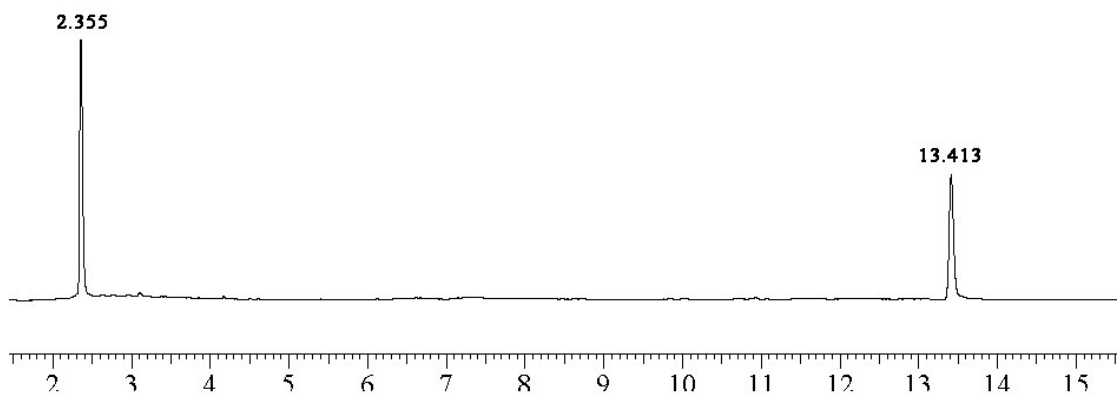

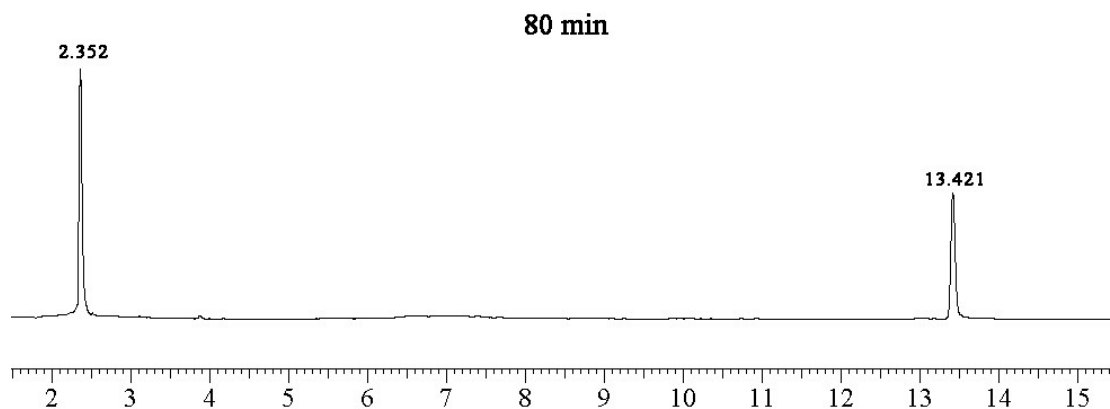

**(a)**

**PEAK LIST**

RT: 0.00-14.50

Number of measured peaks: 2 (the first peak is 2-pentanone, and the second peak is 4-CP)

|      | 0 min     | 20 min | 40 min | 60 min | 80 min |
|------|-----------|--------|--------|--------|--------|
| Apex | 2.343     | 2.334  | 2.320  | 2.352  | 2.347  |
|      | 13.414    | 13.410 | 13.419 | 13.406 | 13.409 |
| Area | 156190    | 207482 | 177495 | 212136 | 202817 |
|      | 133736    | 167772 | 136370 | 147843 | 130443 |
| Mass | 0.0340 g  |        |        |        |        |
|      | 0.00680 g |        |        |        |        |

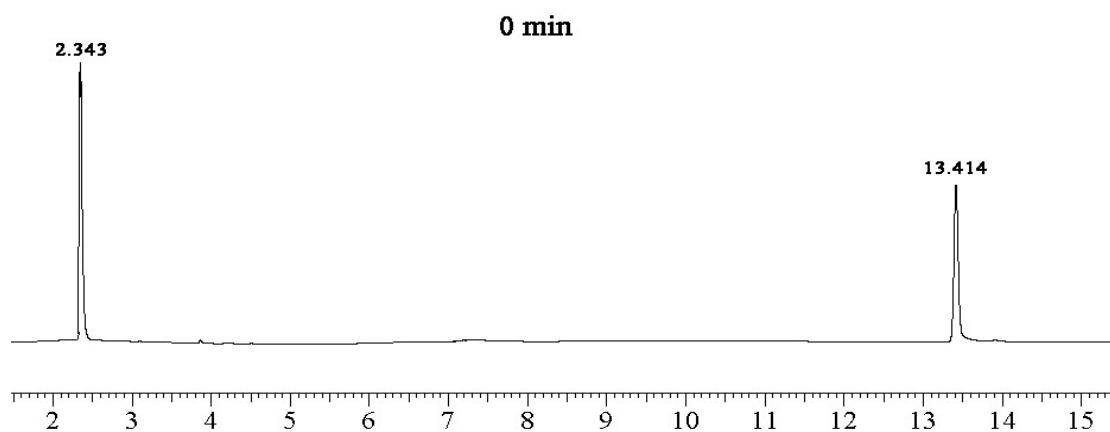

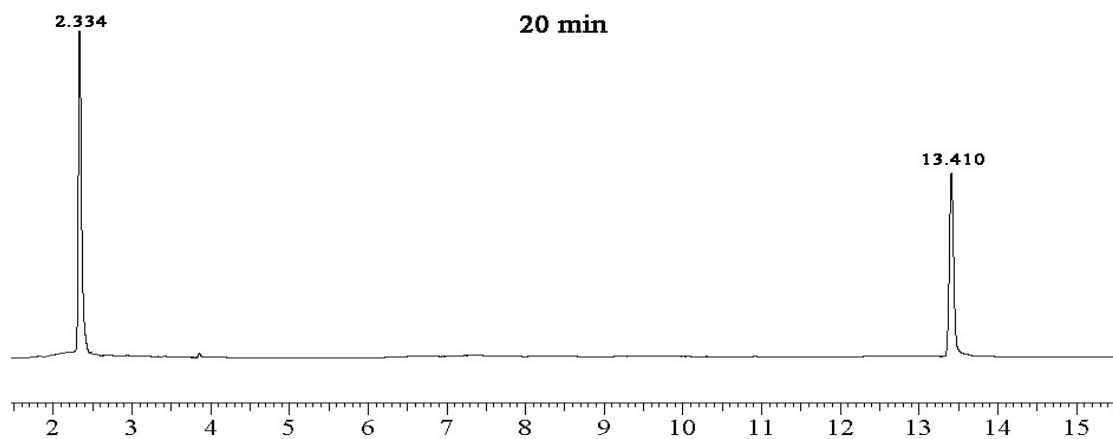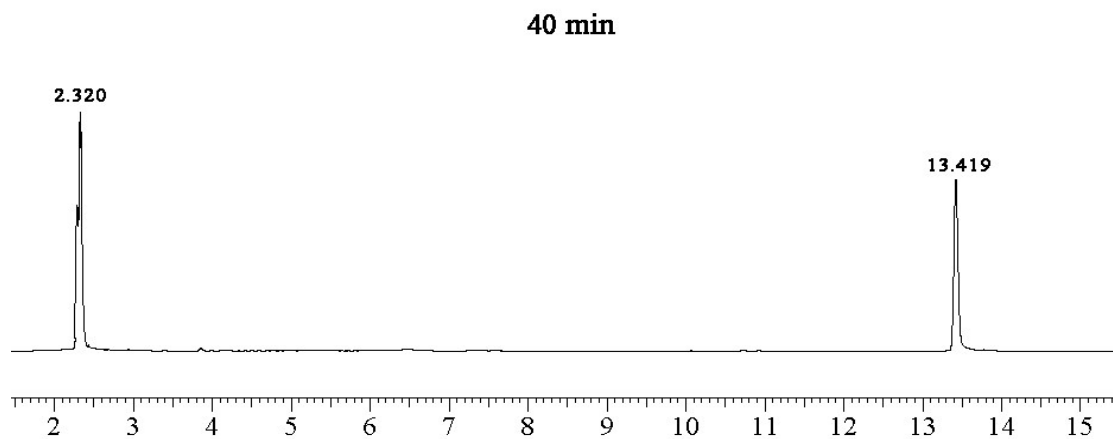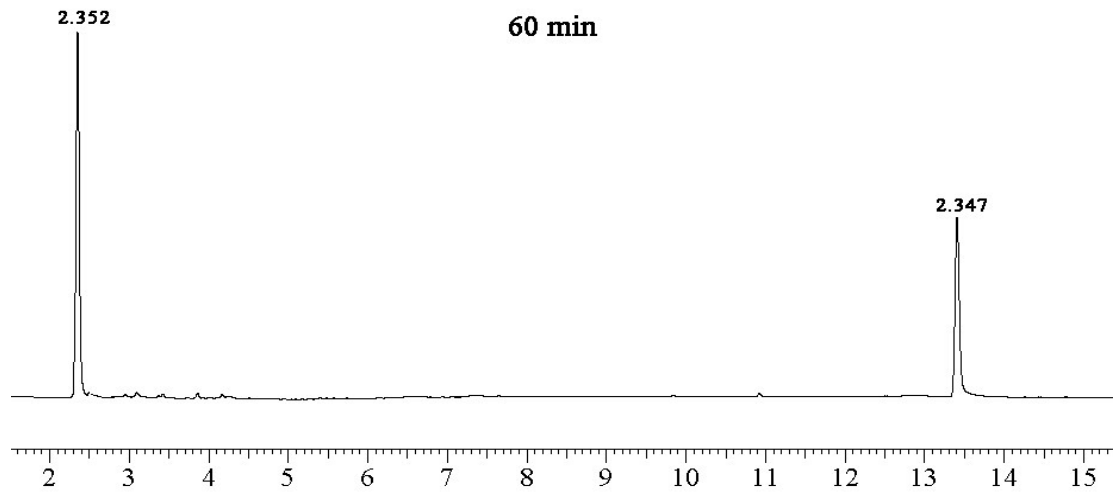

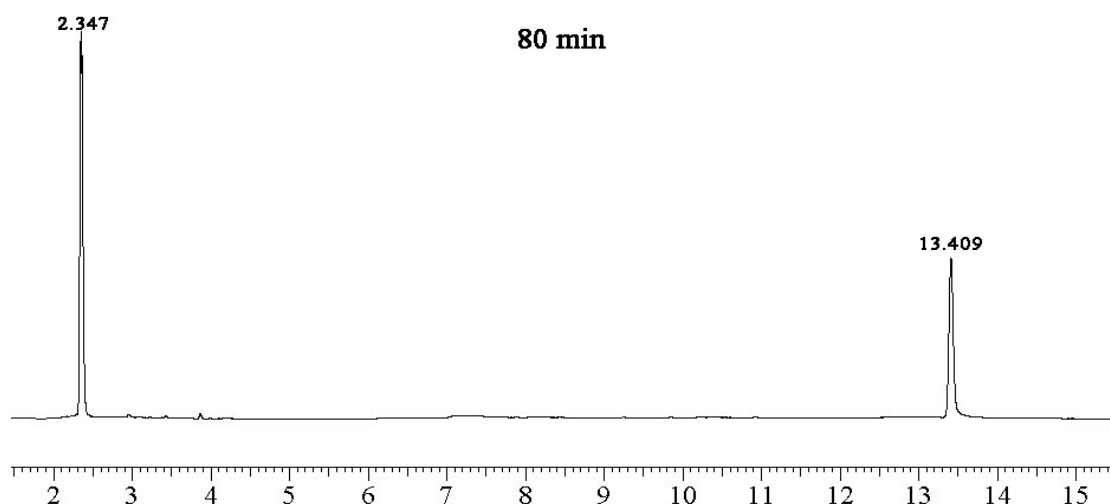

**(b)**

**PEAK LIST**

RT: 0.00-14.50

Number of measured peaks: 2 (the first peak is 2-pentanone, and the second peak is 4-CP)

|      | 0 min     | 20 min | 40 min | 60 min | 80 min |
|------|-----------|--------|--------|--------|--------|
| Apex | 2.341     | 2.361  | 2.347  | 2.348  | 2.355  |
|      | 13.404    | 13.393 | 13.397 | 13.396 | 13.403 |
| Area | 102978    | 236822 | 144726 | 147739 | 109111 |
|      | 132005    | 256290 | 138259 | 119128 | 72728  |
| Mass | 0.0368 g  |        |        |        |        |
|      | 0.00736 g |        |        |        |        |

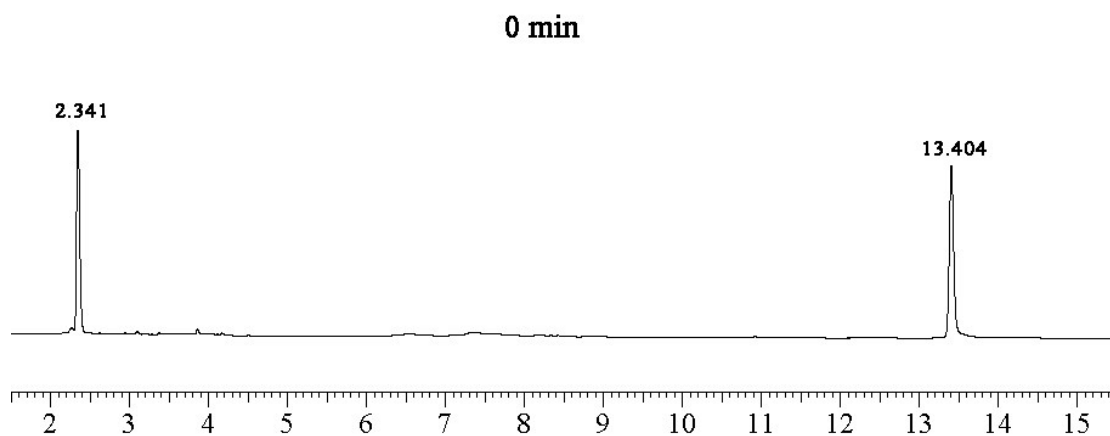

20 min

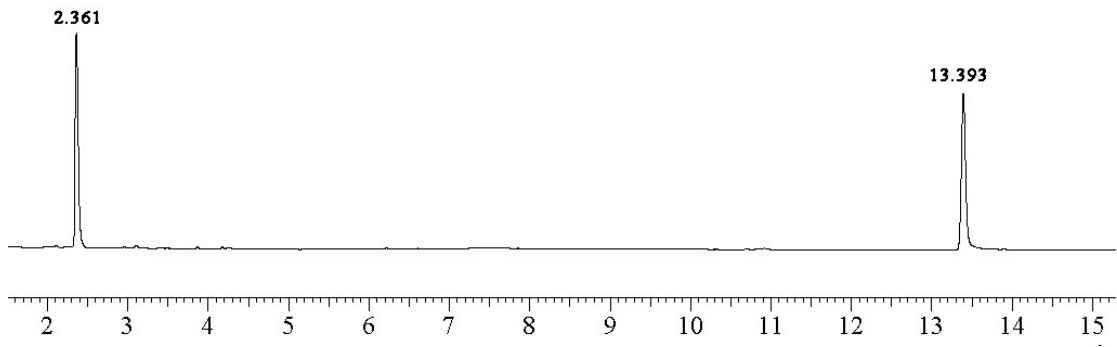

40 min

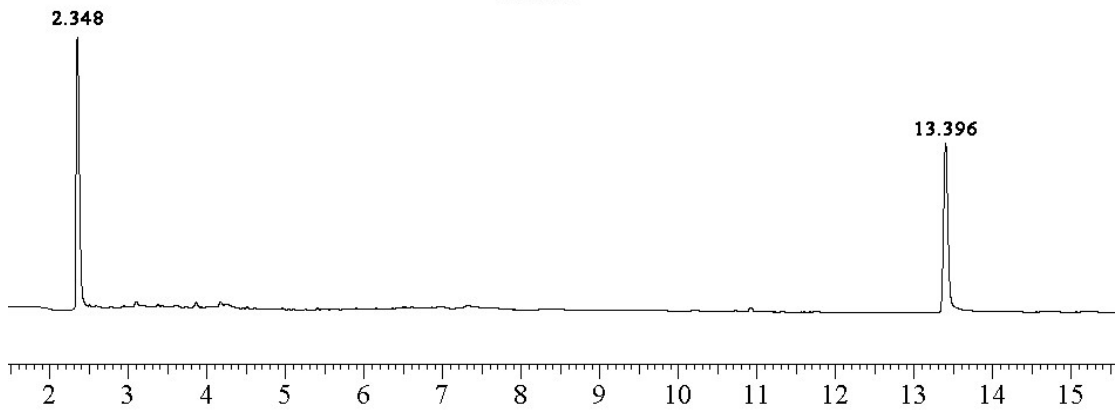

60 min

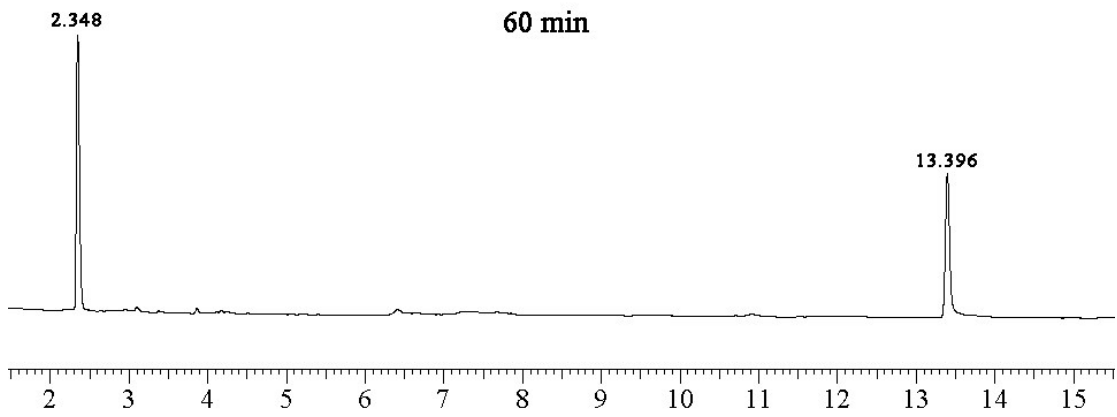

80 min

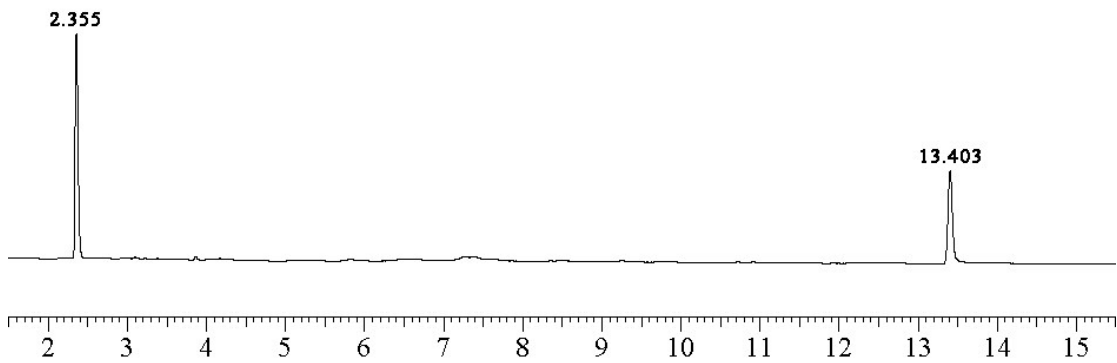

(c)

PEAK LIST

RT: 0.00-14.50

Number of measured peaks: 2 (the first peak is 2-pentanone, and the second peak is 4-CP)

|      | 0 min    | 20 min | 40 min | 60 min | 80 min |
|------|----------|--------|--------|--------|--------|
| Apex | 2.330    | 2.359  | 2.355  | 2.346  | 2.337  |
|      | 13.398   | 13.407 | 13.400 | 13.405 | 13.400 |
| Area | 73007    | 82701  | 59092  | 85043  | 128319 |
|      | 152403.  | 120287 | 66576  | 87755  | 105198 |
| Mass | 0.0391g  |        |        |        |        |
|      | 0.00782g |        |        |        |        |

0 min

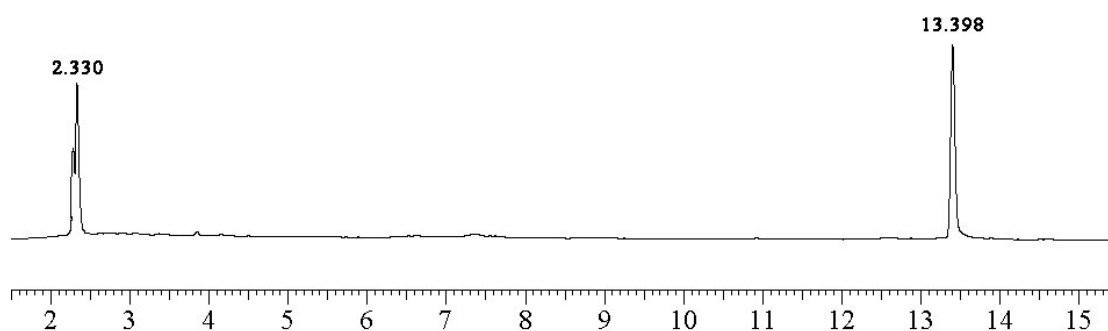

20 min

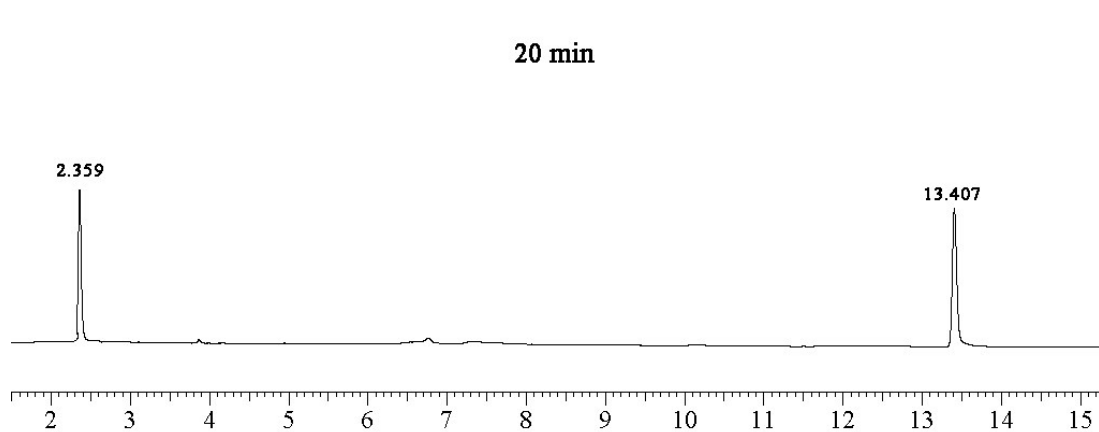

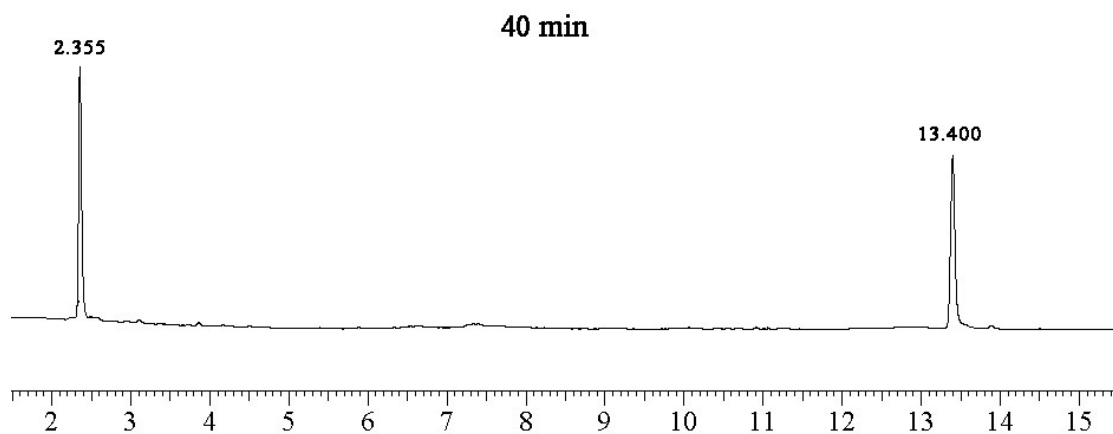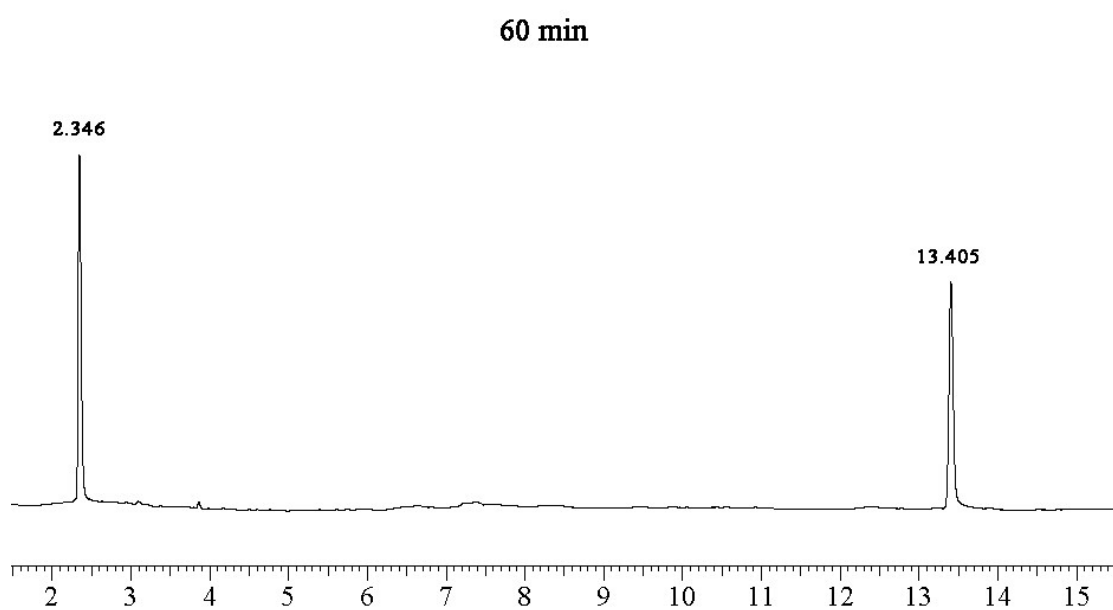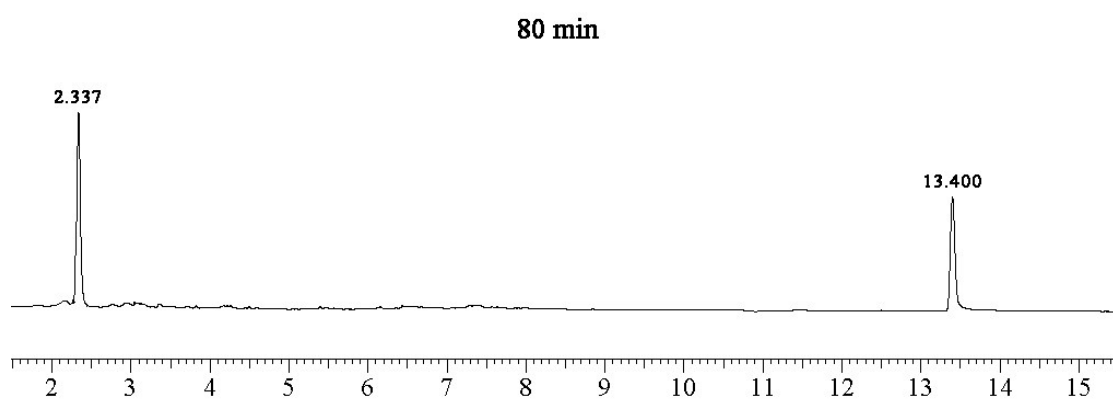

**(d)**

PEAK LIST

RT: 0.00-14.50

Number of measured peaks: 2 (the first peak is 2-pentanone, and the second peak is 4-CP)



|      | 0 min    | 20 min | 40 min | 60 min | 80 min |
|------|----------|--------|--------|--------|--------|
| Apex | 2.344    | 2.349  | 2.345  | 2.365  | 2.367  |
|      | 13.400   | 13.402 | 13.405 | 13.398 | 13.396 |
| Area | 158032   | 119609 | 136142 | 97401  | 66340  |
|      | 176307.  | 113873 | 115046 | 64692  | 36134  |
| Mass | 0.0391g  |        |        |        |        |
|      | 0.00782g |        |        |        |        |

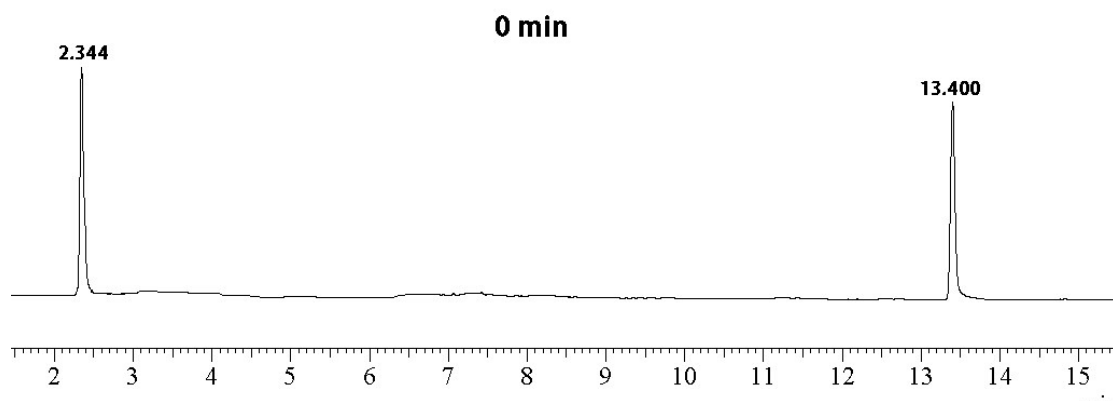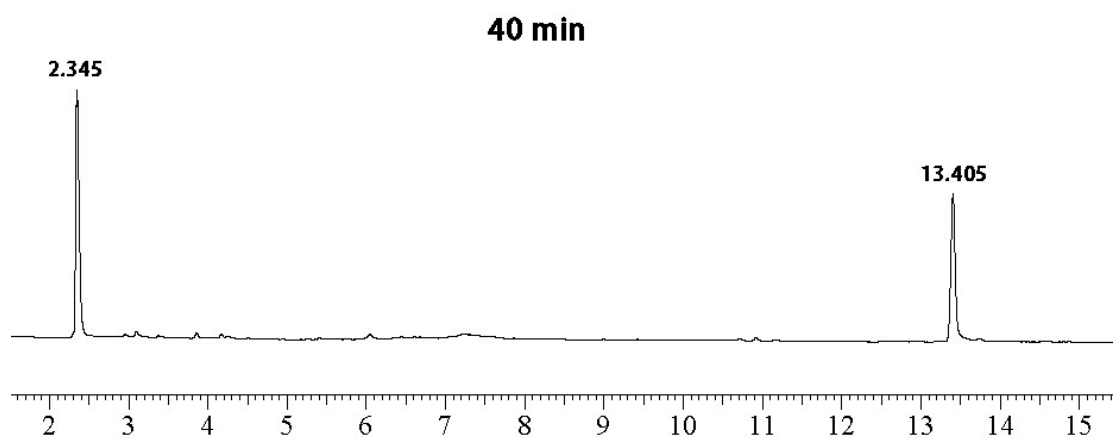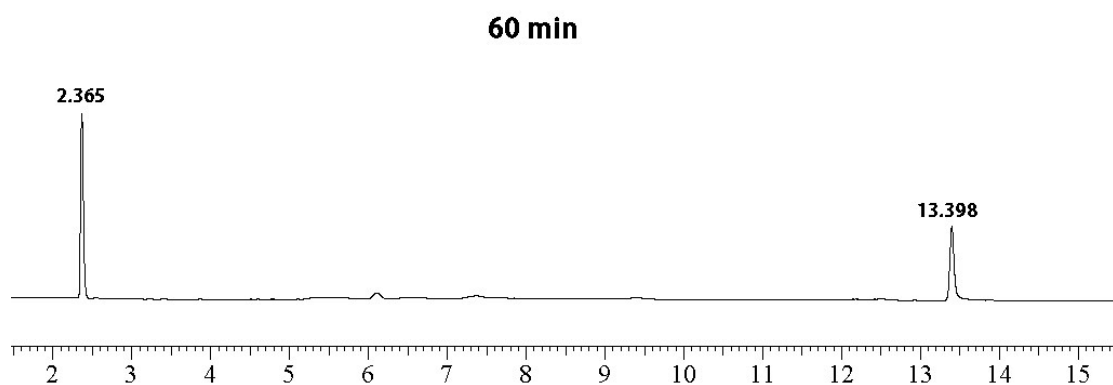

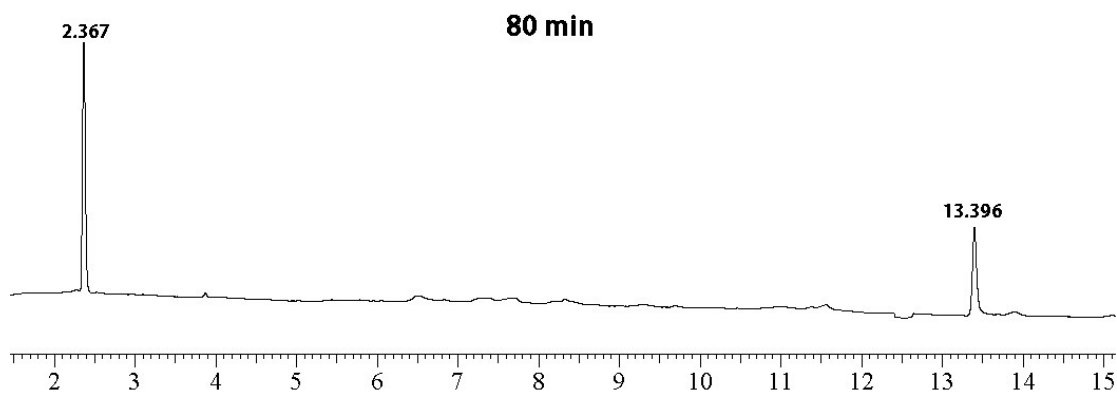

(e)

PEAK LIST

RT: 0.00-14.50

Number of measured peaks: 2 (the first peak is 2-pentanone, and the second peak is 2,4-DCP)

|      | 0 min    | 20 min | 40 min | 60 min | 80 min |
|------|----------|--------|--------|--------|--------|
| Apex | 2.363    | 2.357  | 2.357  | 2.357  | 2.360  |
|      | 9.835    | 9.828  | 9.831  | 9.826  | 9.830  |
| Area | 152454   | 138425 | 148318 | 160711 | 143401 |
|      | 63033    | 53465  | 55989  | 59854  | 52109  |
| Mass | 0.0328g  |        |        |        |        |
|      | 0.00656g |        |        |        |        |

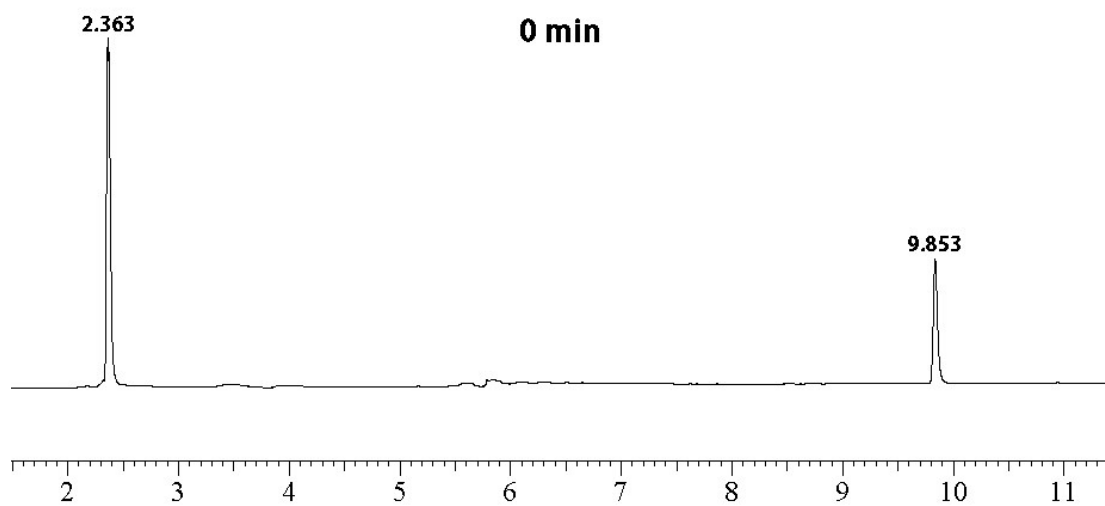

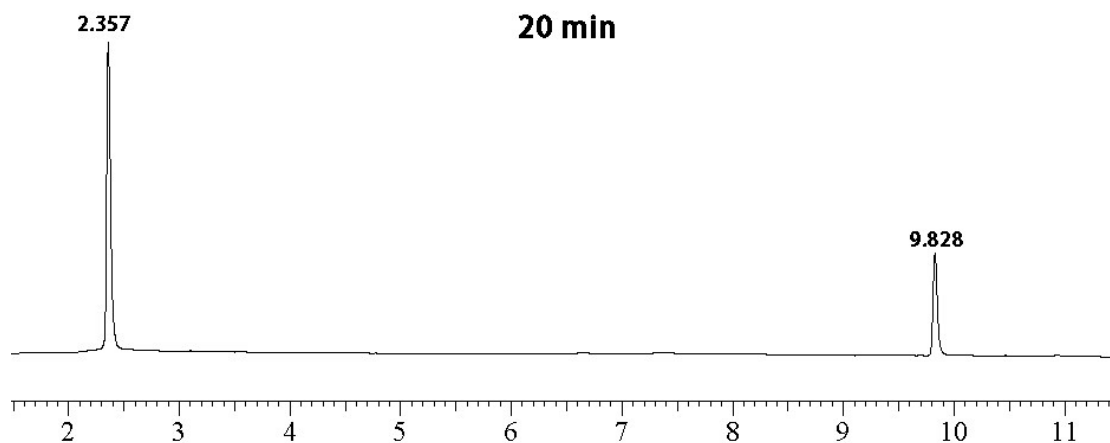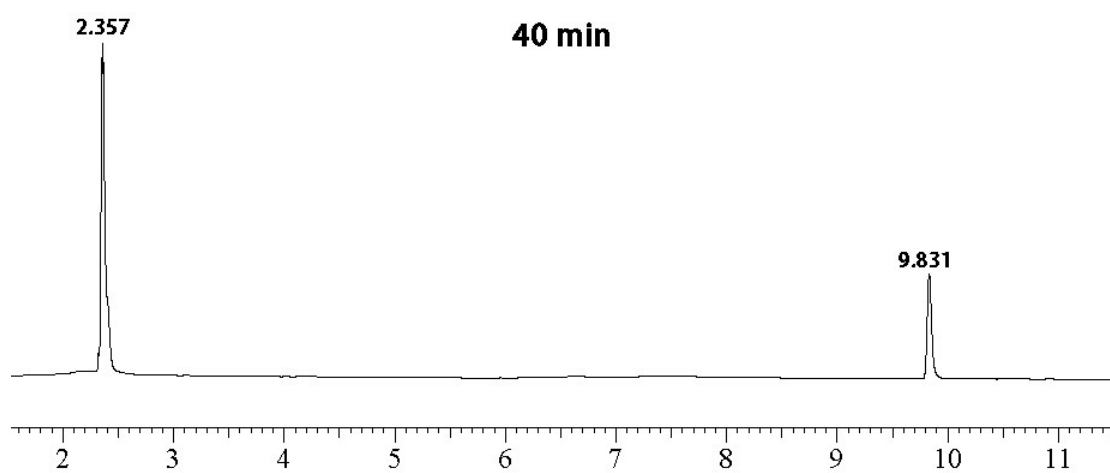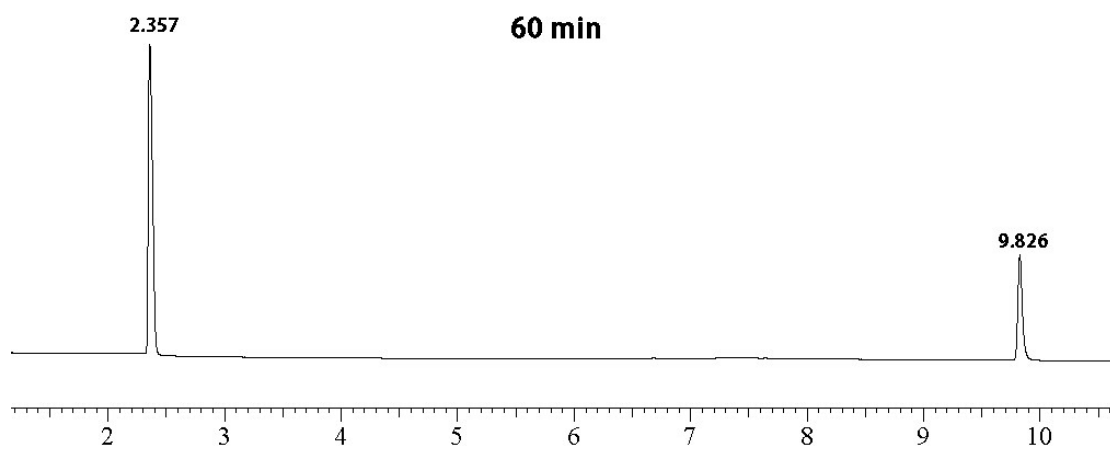

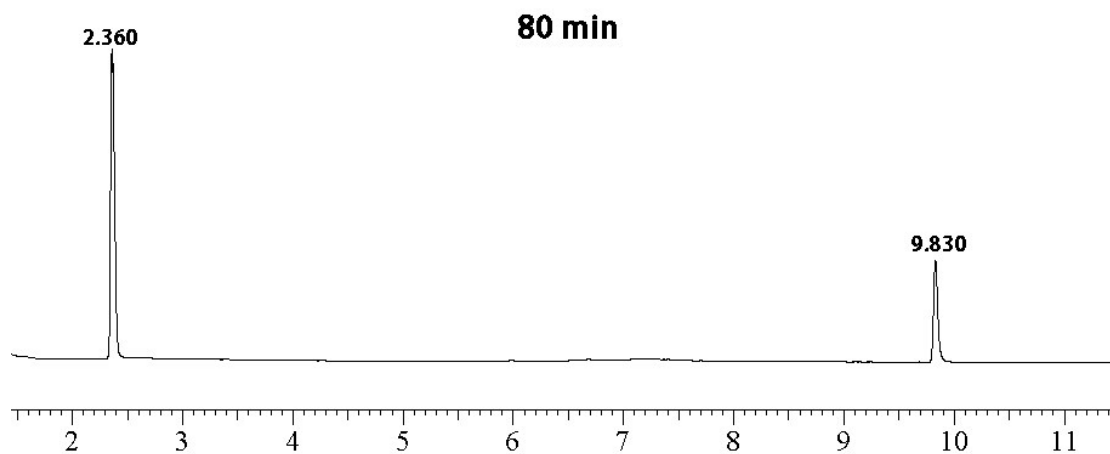

(f)

PEAK LIST

RT: 0.00-14.50

Number of measured peaks: 2 (the first peak is 2-pentanone, and the second peak is 2,4-DCP)

|      | 0 min     | 20 min | 40 min | 60 min | 80 min |
|------|-----------|--------|--------|--------|--------|
| Apex | 2.357     | 2.361  | 2.366  | 2.357  | 2.353  |
|      | 9.830     | 9.830  | 9.835  | 9.833  | 9.824  |
| Area | 88191     | 84551  | 69494  | 154975 | 200432 |
|      | 46638     | 41554  | 31512  | 61931  | 69717  |
| Mass | 0.0286g   |        |        |        |        |
|      | 0.00572 g |        |        |        |        |

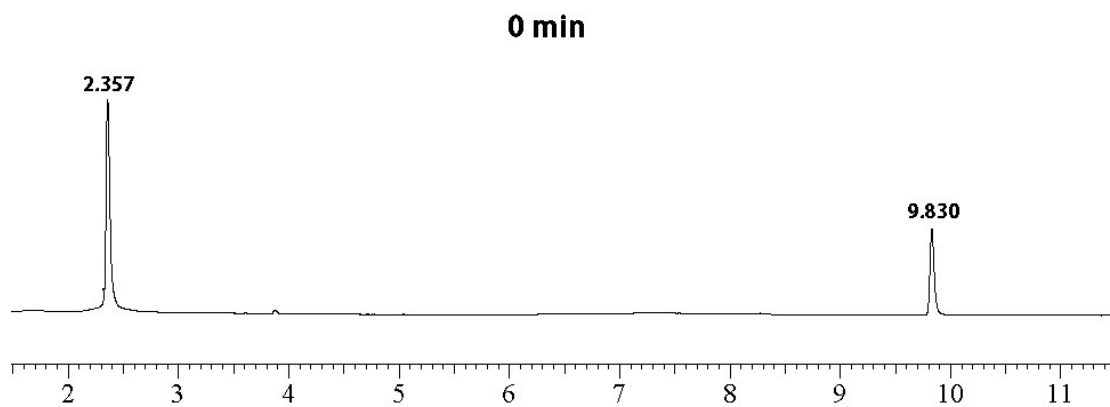

20 min

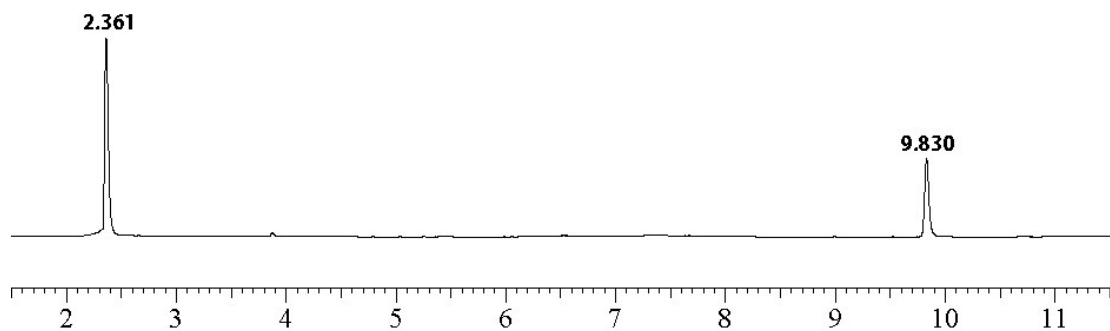

60 min

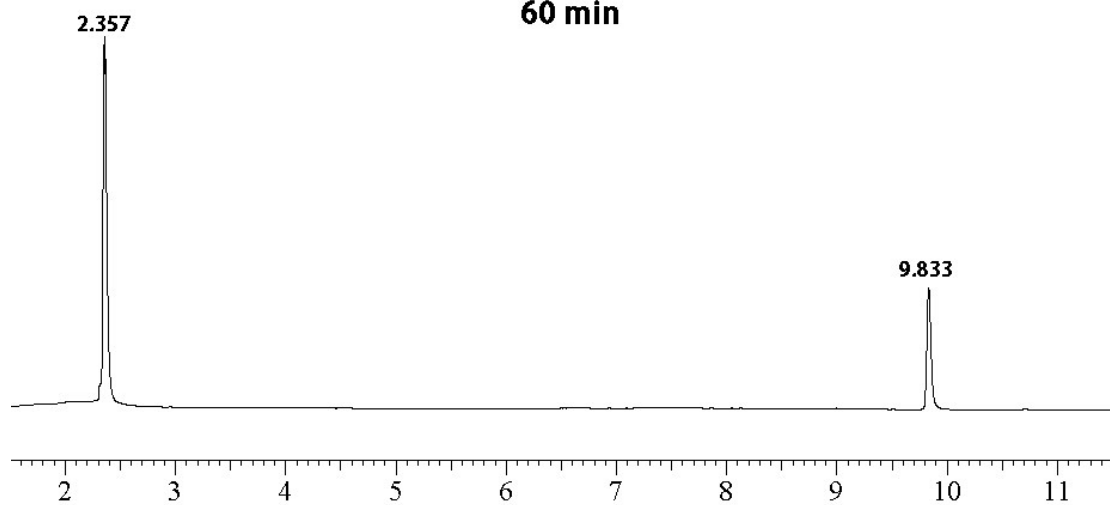

80 min

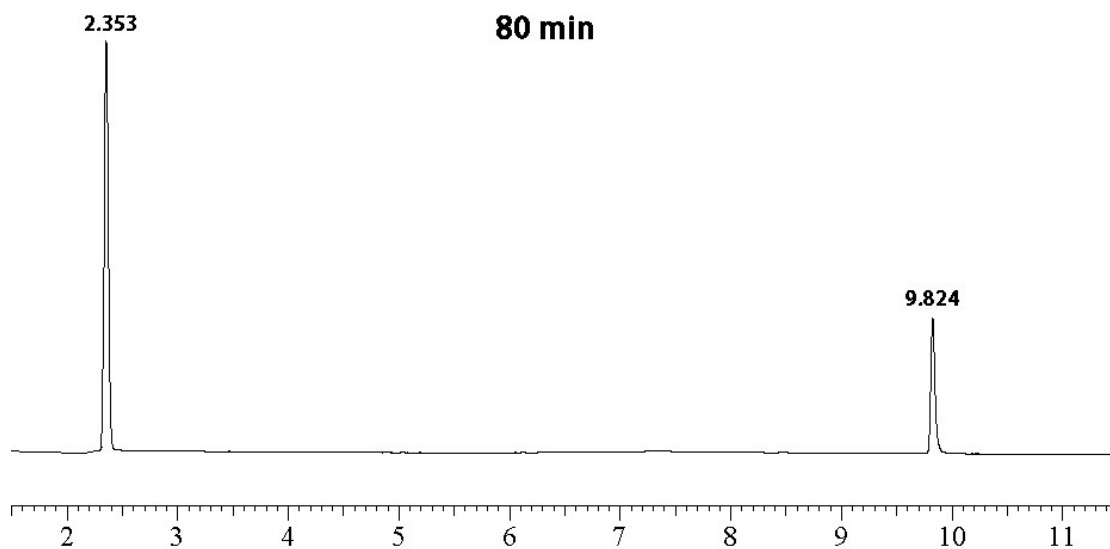

(g)

PEAK LIST

RT: 0.00-14.50

Number of measured peaks: 2 (the first peak is 2-pentanone, and the second peak is 2,4-DCP)

|  | 0 min | 20 min | 40 min | 60 min | 80 min |
|--|-------|--------|--------|--------|--------|
|  |       |        |        |        |        |

|      |          |       |        |        |        |
|------|----------|-------|--------|--------|--------|
| Apex | 2.363    | 2.361 | 2.367  | 2.360  | 2.362  |
|      | 9.847    | 9.833 | 9.835  | 9.827  | 9.836  |
| Area | 81407    | 86120 | 163005 | 144246 | 163768 |
|      | 46260    | 43257 | 71521  | 56596  | 57057  |
| Mass | 0.0307g  |       |        |        |        |
|      | 0.00614g |       |        |        |        |

**0 min**

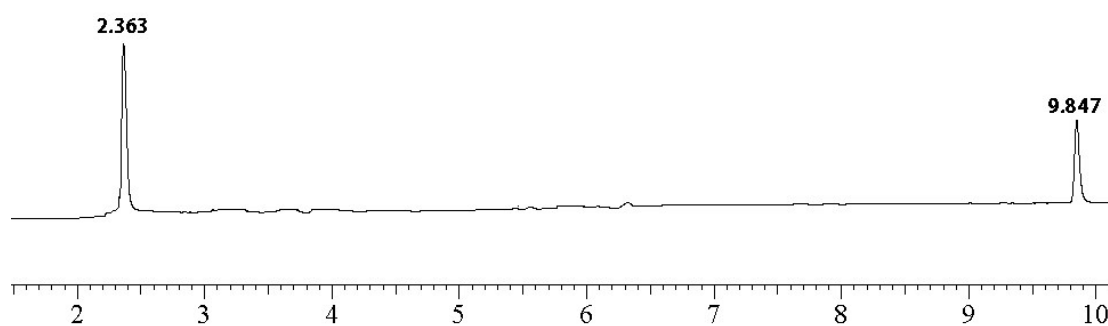

**20 min**

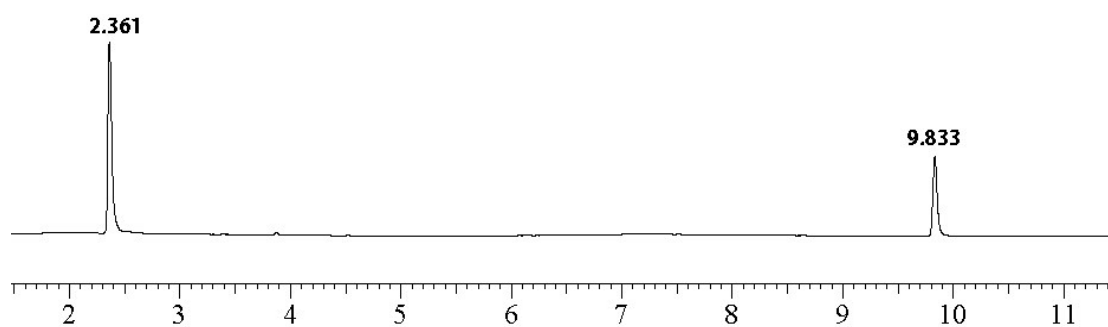

**40 min**

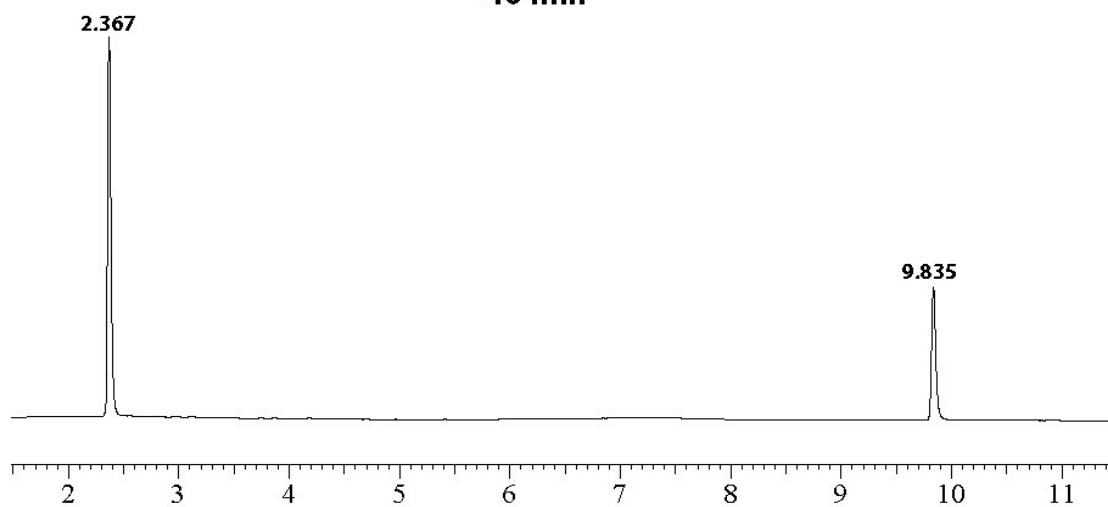

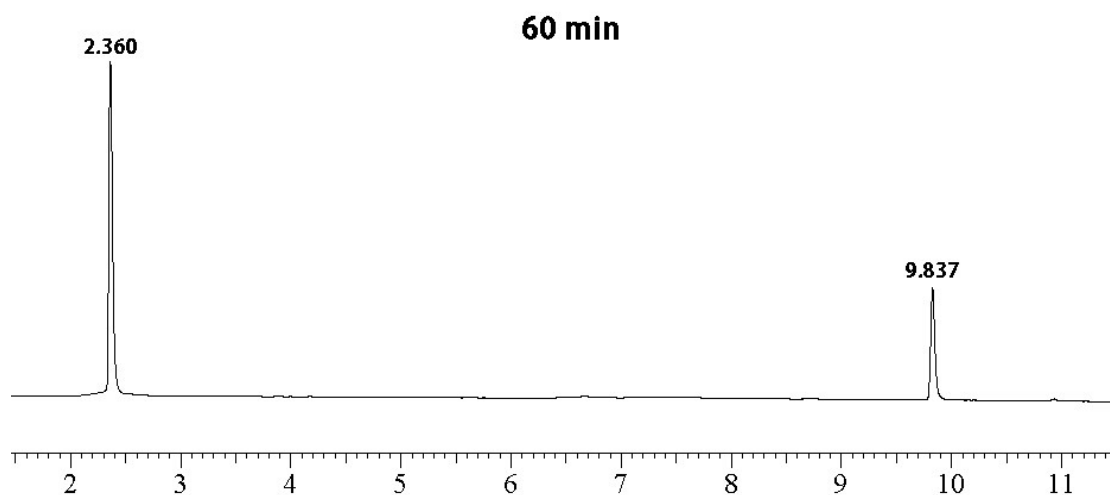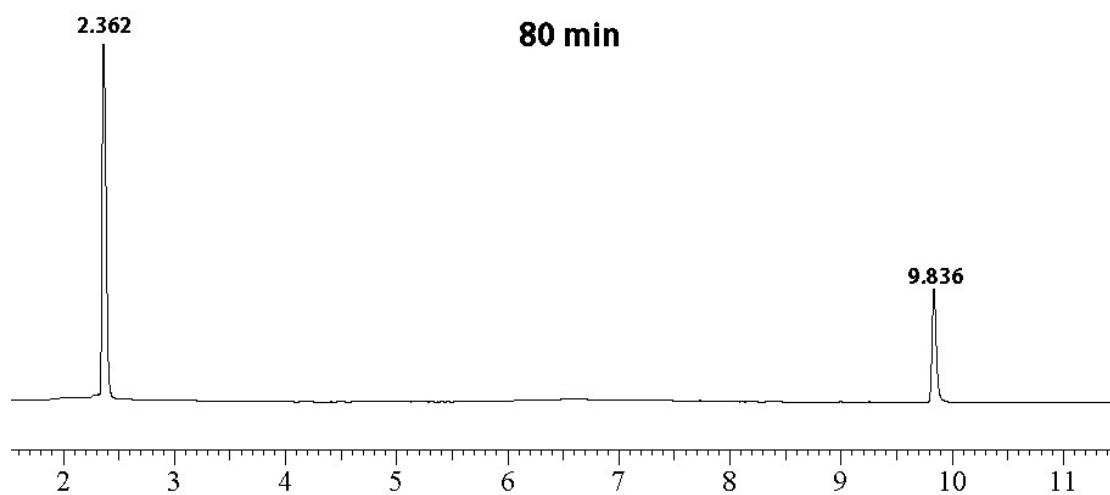

(h)

PEAK LIST

RT: 0.00-14.50

Number of measured peaks: 2 (the first peak is 2-pentanone, and the second peak is 2,4-DCP)

|      | 0 min     | 20 min | 40 min | 60 min | 80 min |
|------|-----------|--------|--------|--------|--------|
| Apex | 2.369     | 2.370  | 2.368  | 2.346  | 2.374  |
|      | 9.798     | 9.794  | 9.796  | 9.800  | 9.802  |
| Area | 44382     | 37727  | 77548  | 83525  | 55488  |
|      | 38329     | 26901  | 50686  | 51731  | 27227  |
| Mass | 0.0345g   |        |        |        |        |
|      | 0.00690 g |        |        |        |        |

**0 min**

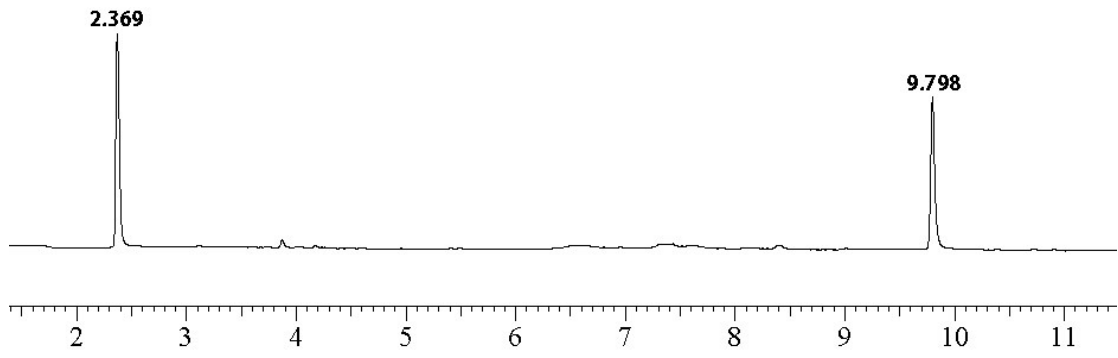

**20 min**

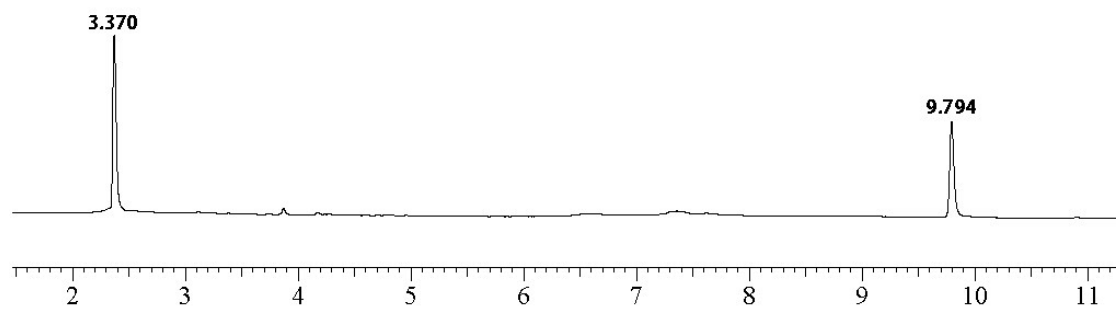

**40 min**

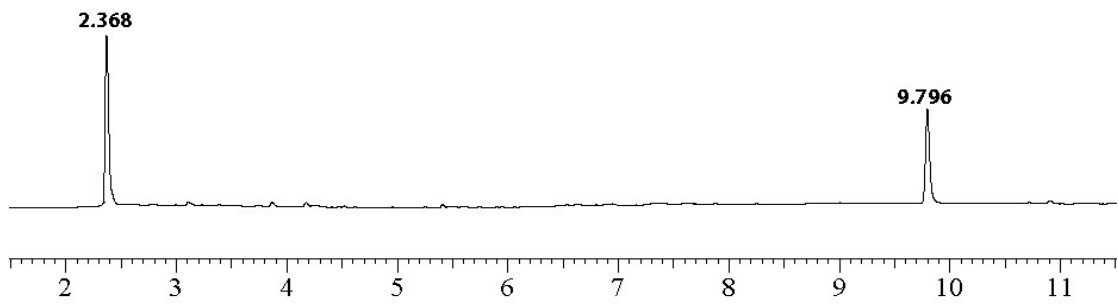

**60 min**

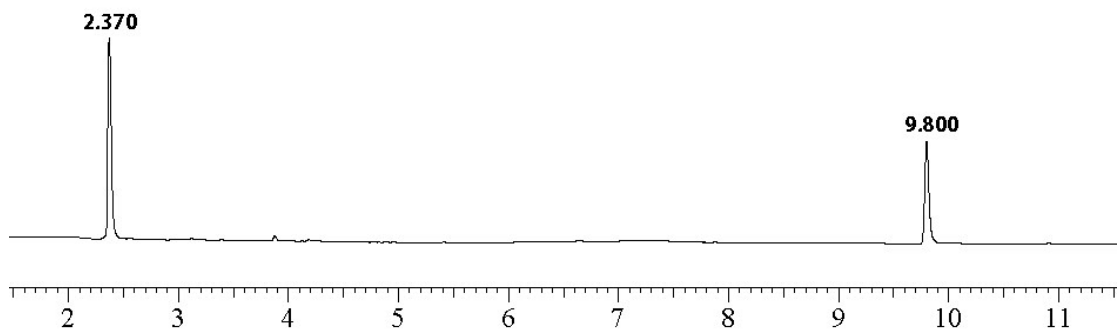



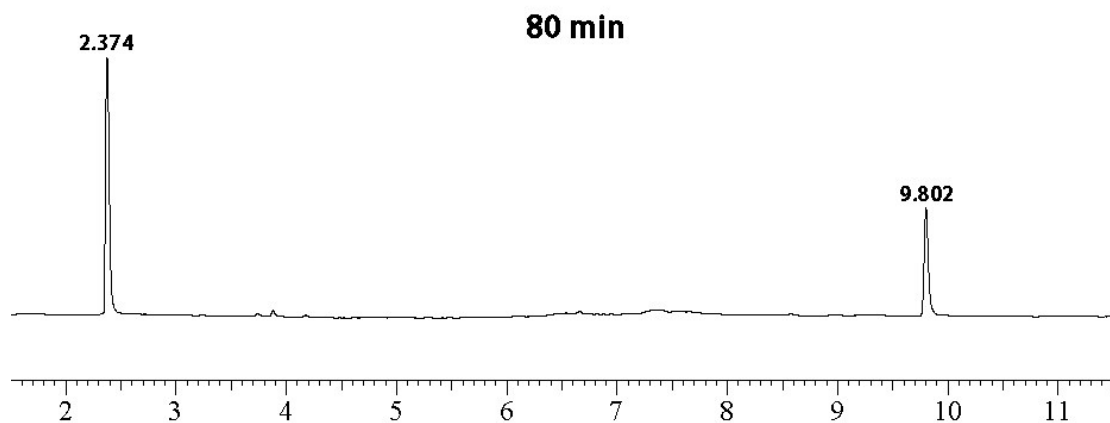

**PEAK LIST**

RT: 0.00-14.50

Number of measured peaks: 2 (the first peak is 2-pentanone, and the second peak is 2,4-DCP)

|      | 0 min    | 20 min | 40 min | 60 min | 80 min |
|------|----------|--------|--------|--------|--------|
| Apex | 2.366    | 2.370  | 2.369  | 2.371  | 2.357  |
|      | 9.802    | 9.799  | 9.795  | 9.803  | 9.826  |
| Area | 52315    | 47464  | 90692  | 67242  | 160711 |
|      | 45695    | 35639  | 56873  | 36314  | 59854  |
| Mass | 0.0302g  |        |        |        |        |
|      | 0.00606g |        |        |        |        |

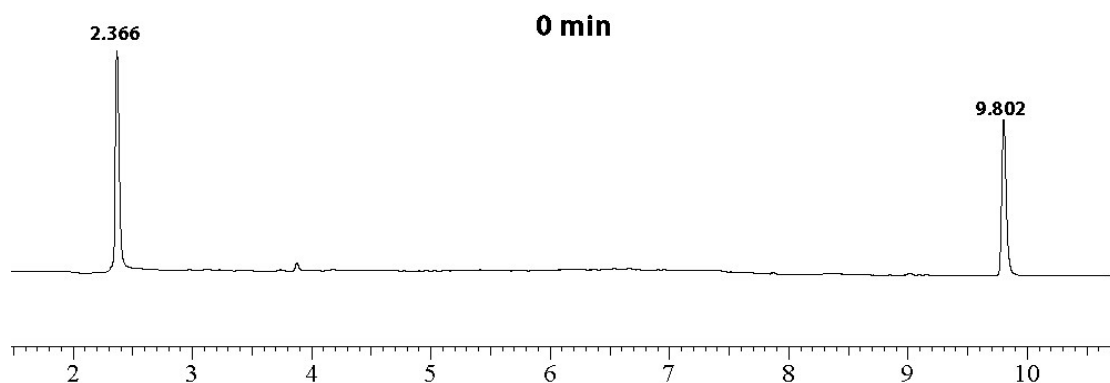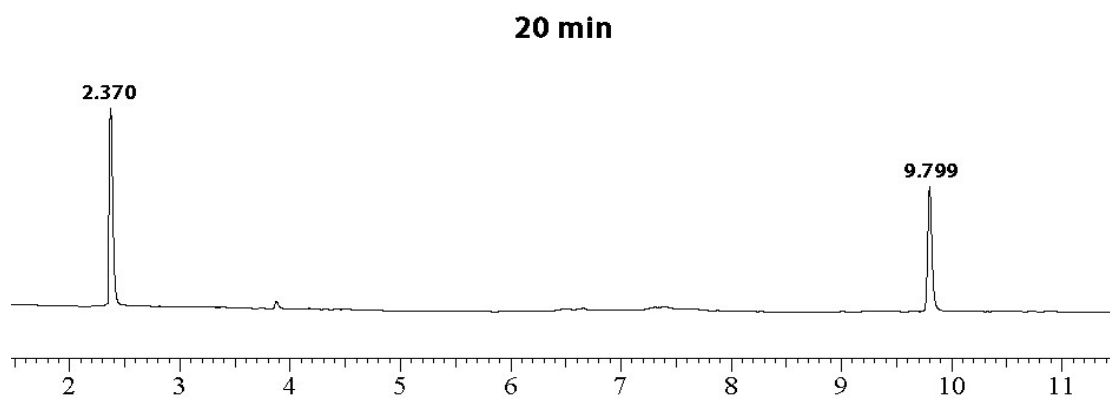

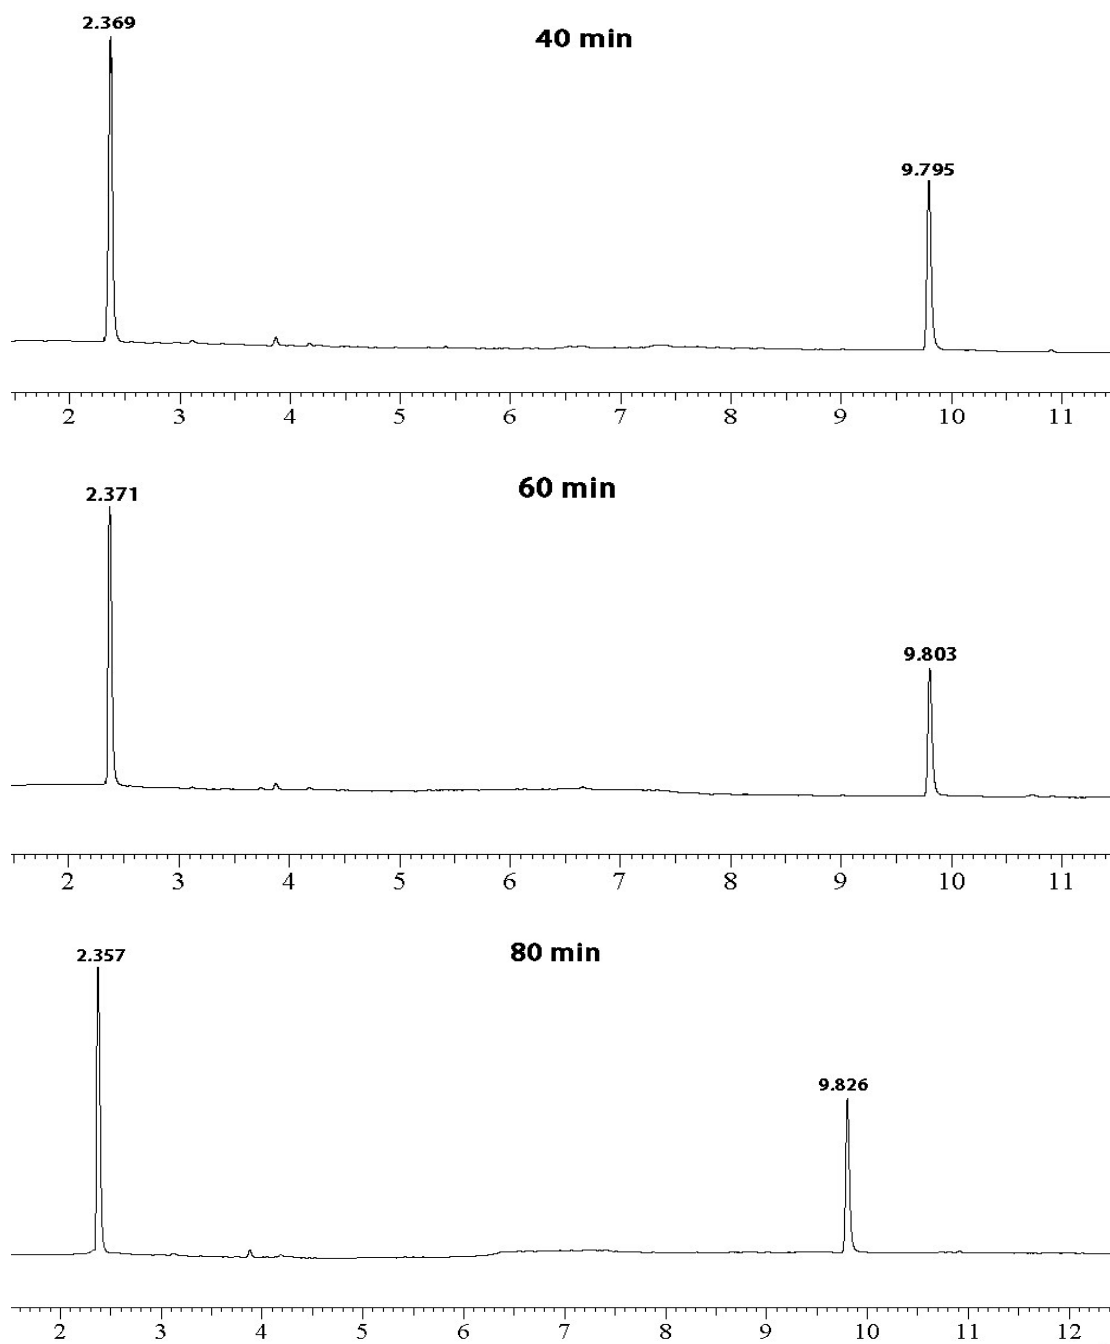

(j)

**Figure S6.** (a)GC of blank experiment of 4-CP. (b) GC of 4-CP catalyzed by compound **2** at pH = 6. (c) GC of 4-CP catalyzed by compound **2** at pH = 4. (d) GC of 4-CP catalyzed by compound **2** at pH = 3. (e) GC of 4-CP catalyzed by compound **1** at pH = 3. (f)GC of blank experiment of 2,4-DCP. (g) GC of 2,4-DCP catalyzed by compound **2** at pH = 6. (h) GC of 2,4-DCP catalyzed by compound **2** at pH = 3. (i) GC of 4-CP catalyzed by compound **2** at pH = 4. (j) GC of 2,4-DCP catalyzed by compound **1** at pH = 4.
